# Supplementary material for: Implementation Facilitation to Promote Emergency Department–Initiated Buprenorphine for Opioid Use Disorder
Source: PubMed Central journal article supplement (PMC10077107; doi:10.1001/jamanetworkopen.2023.5439), 2023-04-05

## Supplemental Online Content

D'Onofrio G, Edelman EJ, Hawk KF, et al. Implementation facilitation to promote emergency department–initiated buprenorphine for opioid use disorder. *JAMA Netw Open*. 2023;6(4):e235439. doi:10.1001/jamanetworkopen.2023.5439

**eFigure 1.** Study Timeline

**eFigure 2.** Time Series Analysis Plot Across All Sites

**eFigure 3.** Time Series Analysis Plots for Each Study Site

This supplemental material has been provided by the authors to give readers additional information about their work.

eFigure 1. Study Timeline

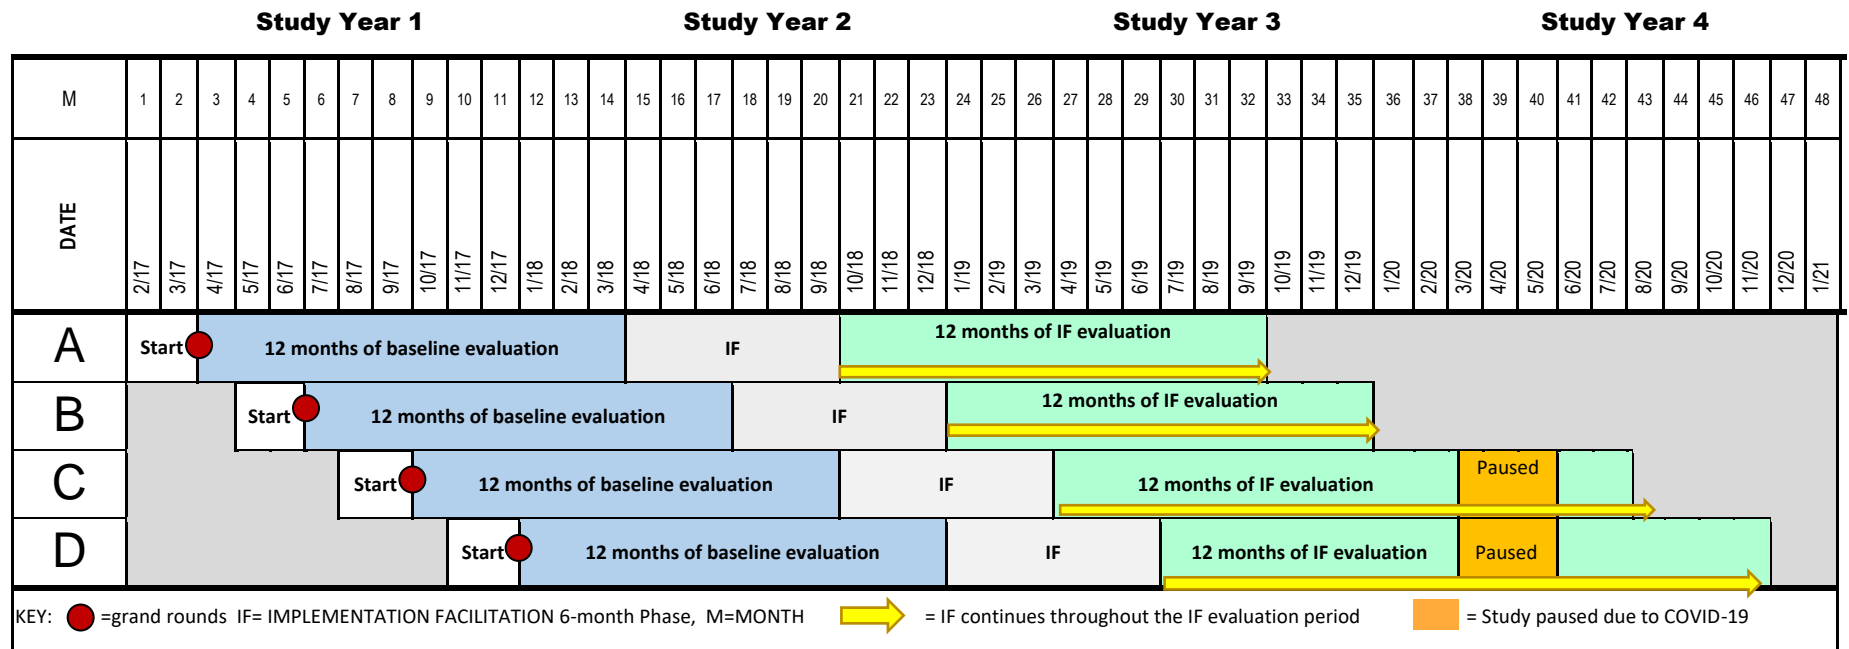

**eFigure 2.** Time Series Analysis Plot Across All Sites

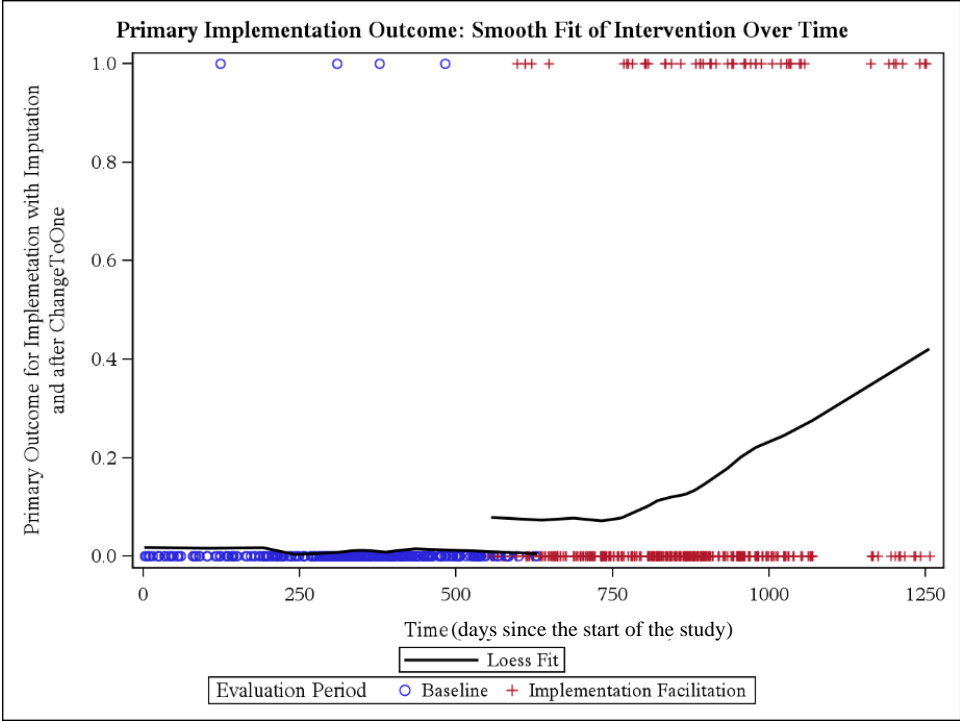

**eFigure 3.** Time Series Analysis Plots for Each Study Site

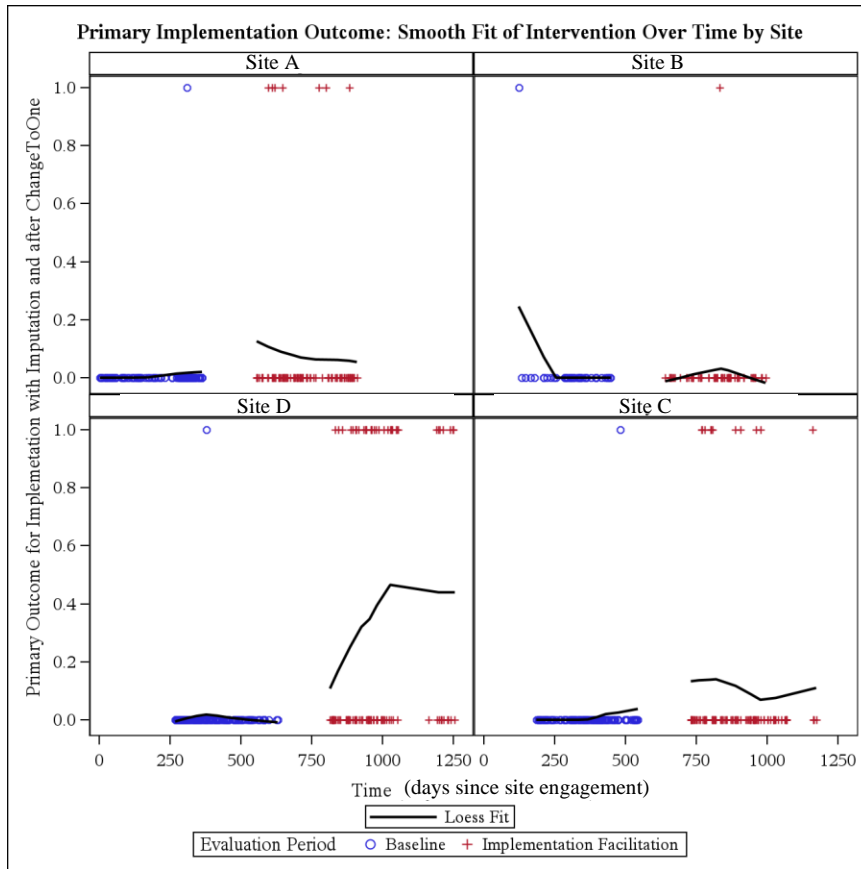

Supplement: jamanetwopen-e235439-s003.pdf [file jamanetwopen-e235439-s003.pdf]
