# Supplementary material for: Implementation Facilitation to Promote Emergency Department–Initiated Buprenorphine for Opioid Use Disorder
Source: PubMed Central journal article supplement (PMC10077107; doi:10.1001/jamanetworkopen.2023.5439), 2023-04-05
Supplement: jamanetwopen-e235439-s004.pdf [file jamanetwopen-e235439-s004.pdf]

## Data Sharing Statement

D'Onofrio. Implementation Facilitation to Promote Emergency Department-Initiated Buprenorphine for Opioid Use Disorder. *JAMA Netw Open*. Published April 05, 2023. doi:10.1001/jamanetworkopen.2023.5439

### Data

**Data available:** Yes

**Data types:** Deidentified participant data, Data dictionary

**How to access data:** This study will comply with the NIH Data Sharing Policy and Implementation Guidance

([https://grants.nih.gov/grants/policy/data\\_sharing/data\\_sharing\\_guidance.htm](https://grants.nih.gov/grants/policy/data_sharing/data_sharing_guidance.htm)). Investigators will also register and report results of the trial in ClinicalTrials.gov, consistent with the requirements of the Policy on the Dissemination of NIH-Funded Clinical Trial Information and the Clinical Trials Registration (<https://grants.nih.gov/policy/clinical-trials/reporting/understanding/nih-policy.htm>). Primary data for this study will be available to the public in the NIDA data repository, per NIDA CTN policy. For more details on data sharing please visit <https://datashare.nida.nih.gov/>. No qualitative data will be shared.

**When available:** With publication

### Supporting Documents

**Document types:** None

### Additional Information

**Who can access the data:** Researchers whose proposed use of the data has been approved.

**Types of analyses:** Researchers with specified aims e.g. meta-analyses or new research questions with analytical approaches clearly defined.

**Mechanisms of data availability:** After approval of a proposal, and with a signed data access agreement. The original investigator team will not supply financial support.
